# Supplementary material
Source: Springer Nature journal article supplement (https://www.springermedizin.de/resource/supplementary/12889_2012_5369_MOESM1_ESM.pdf/9495232)
Supplement: MOESM1 [file 9495232]

Potentially relevant publications identified from search strategy:

**$N = 1135$**

Title read: Focus of publication met selection criteria.

**$n=235$**

No

Publications discarded:

$n=900$

Yes/Unclear

Abstracts read: Focus of publication met selection criteria.

**$n=69$**

No

Publications discarded:

$n=166$

Yes/Unclear

Full text of publication met further selection criteria.

**$n=9$**

No

Publications discarded:

$n=60$

\* Yes

Publications retained for inclusion in review:

**$N = 9$**
